# Supplementary material for: Caveolae Contribute to the Apoptosis Resistance Induced by the α1A-Adrenoceptor in Androgen-Independent Prostate Cancer Cells
Source: PubMed Central journal article supplement (PMC2742726; doi:10.1371/journal.pone.0007068), 2009-09-18

# Supplementary data: Figure 1A and 1B

**A**

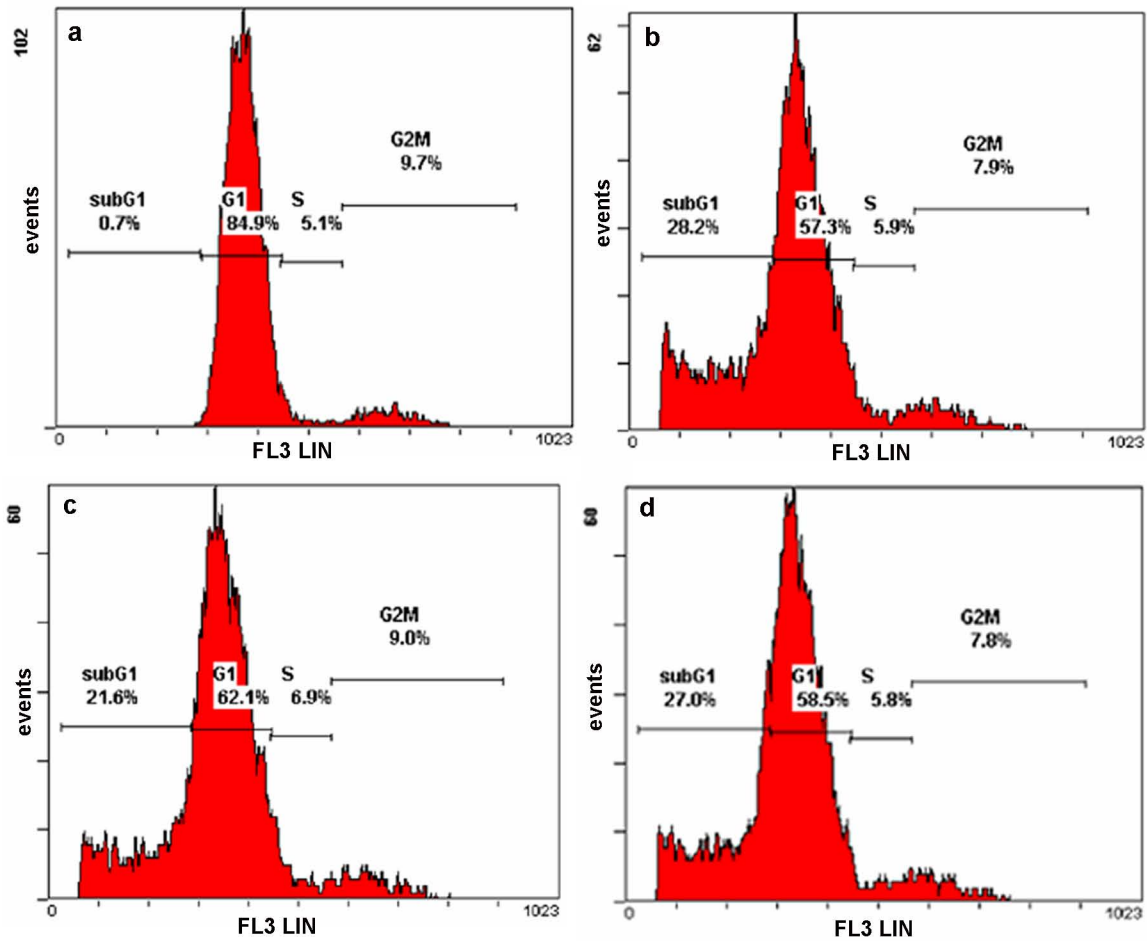

**B**

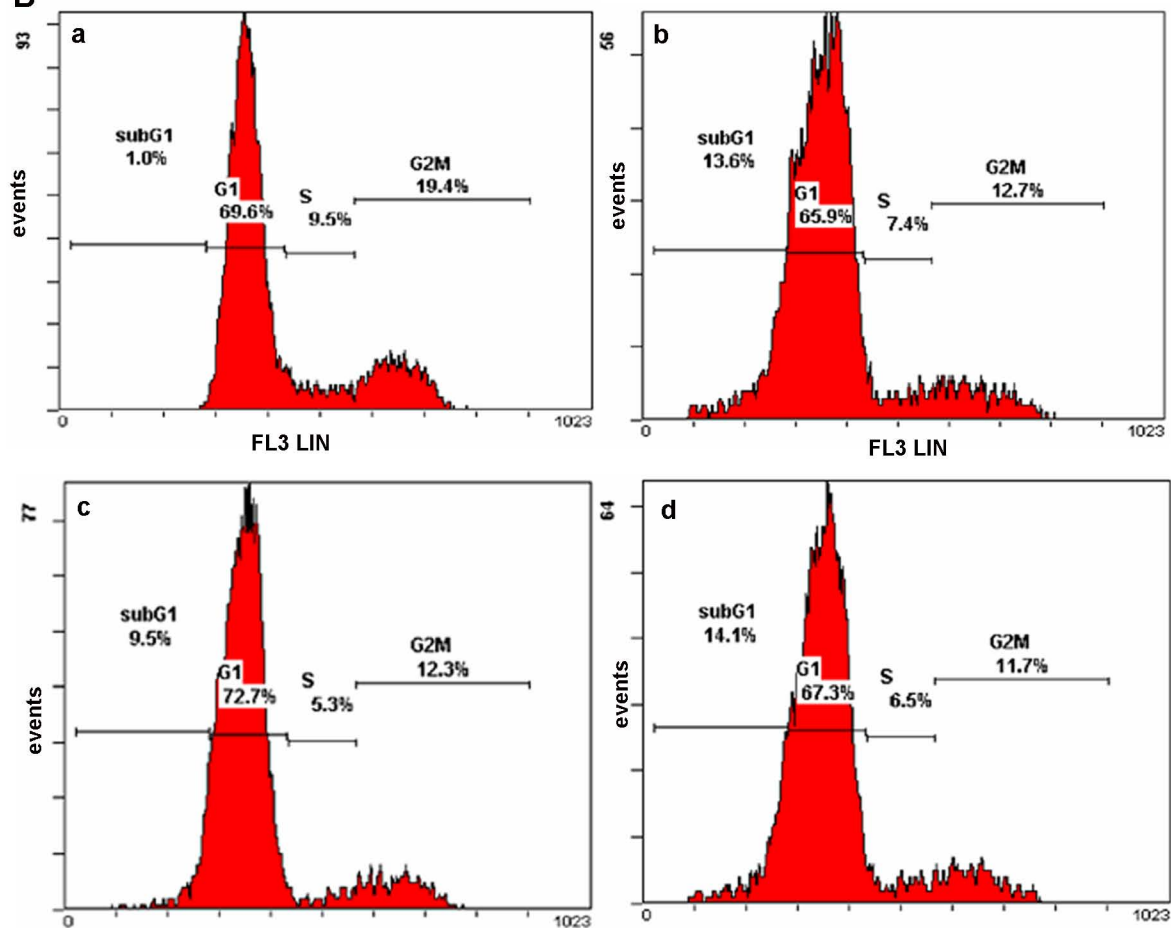

# Supplementary data: Figure 1C and 1D

**C**

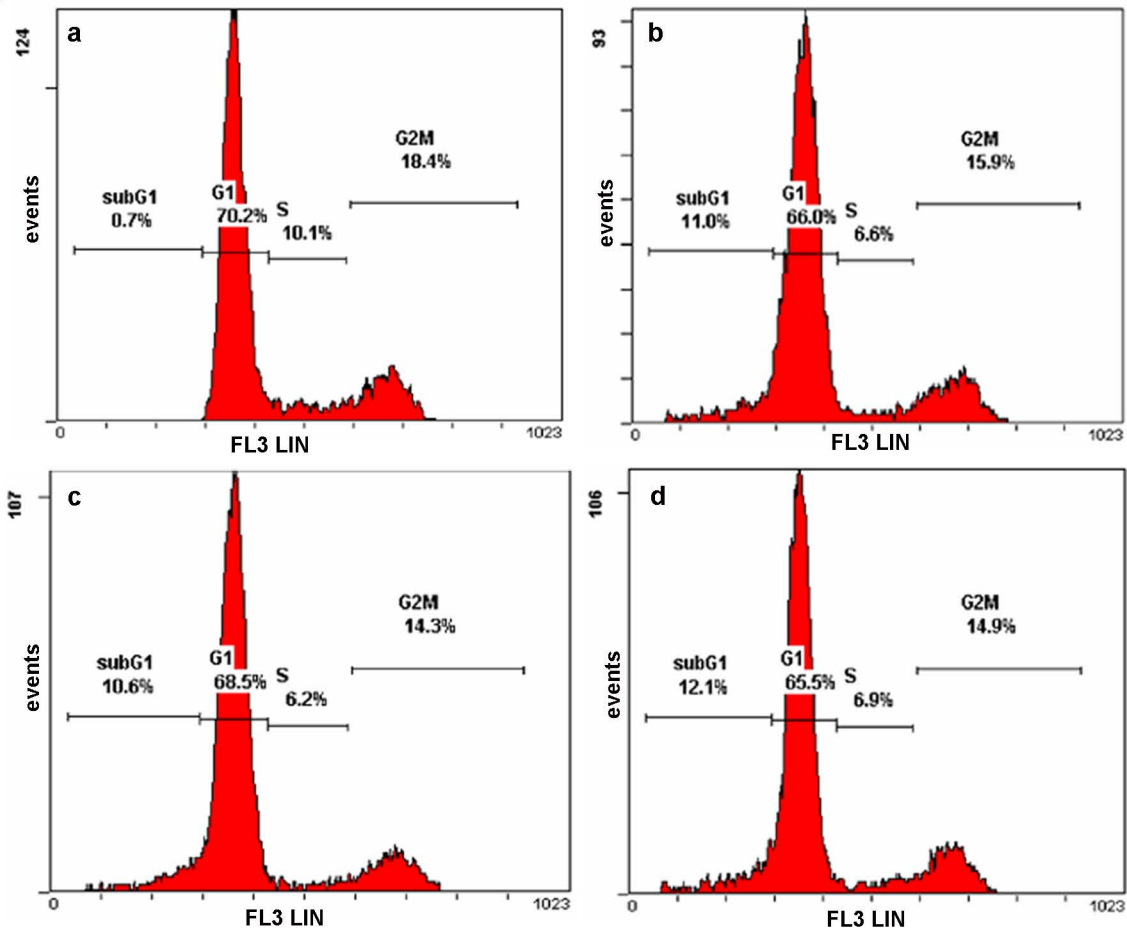

**D**

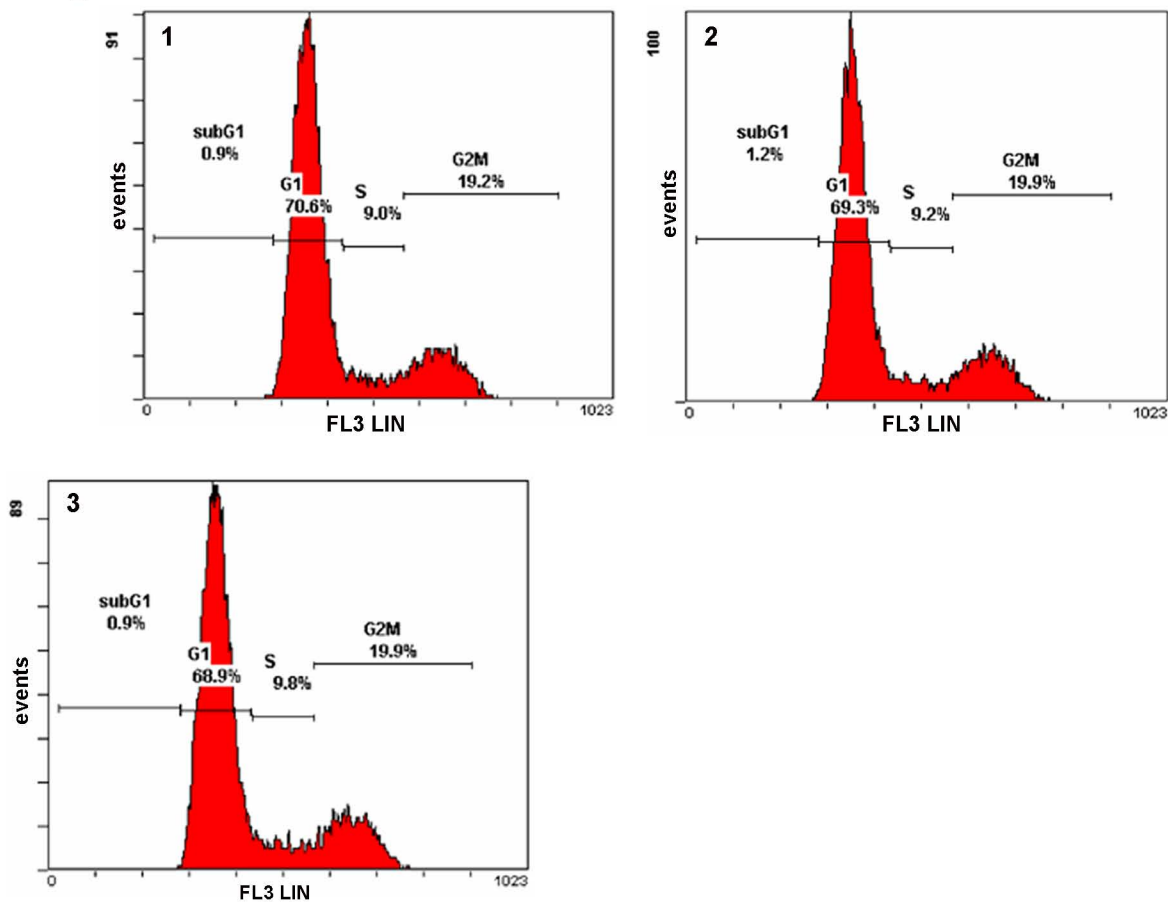

Supplement: pone.0007068.s001.pdf [file pone.0007068.s001.pdf]
